# Supplementary material for: Is Folate Status a Risk Factor for Asthma or Other Allergic Diseases?
Source: PubMed Central journal article supplement — Allergy Asthma Immunol Res. 2015 Jul 14;7(6):538–46. doi: 10.4168/aair.2015.7.6.538 (PMC4605926; doi:10.4168/aair.2015.7.6.538), 2015-07-14
Supplement: aair-7-538-s002.pdf [file aair-7-538-s002.pdf]

**Table S2.** The characteristics of included study (case-control study)

| Study                      | Study Design                                                                                                                                               | Definition of Outcomes                                                                                       | Measurement of Folate/Folic Acid Status                 | Main Findings                                                                                                                                                                                             | Study Limitations                                                                                                        | Adjusted Factors                                                                                                                                                                        | Quality Assessment Score |
|----------------------------|------------------------------------------------------------------------------------------------------------------------------------------------------------|--------------------------------------------------------------------------------------------------------------|---------------------------------------------------------|-----------------------------------------------------------------------------------------------------------------------------------------------------------------------------------------------------------|--------------------------------------------------------------------------------------------------------------------------|-----------------------------------------------------------------------------------------------------------------------------------------------------------------------------------------|--------------------------|
| Haberg 2011 <sup>17</sup>  | Case-control study of 1,962 children (case/control: 507/1455) in Norway, carried out in 2002-2004, embedded in the MoBa study, and followed up to age 3 yr | Asthma: mother report and had used inhalant medication                                                       | Maternal blood plasma folate level                      | Maternal plasma folate in the second trimester of pregnancy was linearly associated with increased risk of asthma at age 3 yr                                                                             | Lack of data on dietary intake, and nonassessment of folate status in early pregnancy                                    | Maternal educational level, maternal age, parity, maternal atopy, maternal body mass index, maternal smoking in pregnancy, maternal smoking at age 3 yr, and supplement use at age 3 yr | 7                        |
| Farres 2011 <sup>18</sup>  | Case-control study of 180 adults (case/control: 120/60) in Egypt, carried out in 2009-2010                                                                 | Asthma: doctor-diagnosed, GINA 2007<br>Atopic: at least one positive SPT                                     | Serum folate level                                      | No significant association between serum folate levels and asthma or FEV1. Among atopic asthmatics, serum folate levels were inversely associated with total IgE levels, and the number of positive SPTs. | Small sample size, nonassessment of dietary intake, and limited adjustment for potential confounding factors             | Age and sex                                                                                                                                                                             | 6                        |
| Bueso 2011 <sup>19</sup>   | Case-control study of 169 children (case/control: 93/76) aged 13-14 yr in Norway, carried out in 2005-2006, embedded in the ECA study                      | Asthma: doctor-diagnosed and/or symptoms and/or medication use, at least fulfilled two of the three criteria | folate consumption from foods and folic acid supplement | No significant association between dietary intake of folate and asthma                                                                                                                                    | Small sample size, and limited adjustment for potential confounding factors                                              | Age and sex                                                                                                                                                                             | 8                        |
| Shaheen 2011 <sup>20</sup> | Case-control study of 40 children (case/control: 20/20) in India, carried out in 2009-2010                                                                 | AD: physician diagnosed                                                                                      | Serum folic acid level                                  | No significant association between serum folic acid level and AD                                                                                                                                          | Small sample size, lack of data on dietary intake, and lack of adjustment for potential confounding factors              | NA                                                                                                                                                                                      | 6                        |
| Oh 2010 <sup>21</sup>      | Case-control study of 422 children (case/control: 180/242) in Korea, carried out in 2006-2007                                                              | AD: ISAAC                                                                                                    | folate consumption from foods and folic acid supplement | Intake of folic acid was inversely associated with AD risk                                                                                                                                                | Lack of data on folate levels, and potential selection bias                                                              | Monthly household income, parental histories of allergic diseases, and the child's age, gender, body mass index, supplement intake (ye s/no), and total energy intake                   | 8                        |
| Patel 2006 <sup>22</sup>   | Case-control study of 1030 adults (case/control: 515/515) in UK, carried out from 1993-1998, embedded in the EPIC-Norfolk study                            | Asthma: physician diagnosed                                                                                  | folate consumption from foods                           | Increased intake of folate was associated with reduced risk of asthma                                                                                                                                     | Nonassessment of folate supplementation                                                                                  | Pack years smoked, social class, BMI, increasing level of physical activity and level of education                                                                                      | 8                        |
| Zhou 2003 <sup>23</sup>    | Case-control study of 1,682 adults (case/control: 433/1,249) in Japan, carried out in 2001-2002                                                            | Asthma: NA                                                                                                   | MTHFR C677T polymorphism                                | The TT genotype of MTHFR C677T was significant associated with increased risk of atopic asthma                                                                                                            | Lack of data on folate levels, lack of clear asthma definition, and lack of adjustment for potential confounding factors | NA                                                                                                                                                                                      | 4                        |

MoBa, Norwegian Mother and Child Cohort Study; GINA, Global Initiative for Asthma; SPT, Skin Prick Test; AD, Atopic dermatitis; EPIC-Norfolk, Norfolk arm of the European Prospective Investigation of Cancer; MTHFR, methylene-tetrahydrofolate reductase.
