# Supplementary material for: Is Folate Status a Risk Factor for Asthma or Other Allergic Diseases?
Source: PubMed Central journal article supplement — Allergy Asthma Immunol Res. 2015 Jul 14;7(6):538–46. doi: 10.4168/aair.2015.7.6.538 (PMC4605926; doi:10.4168/aair.2015.7.6.538), 2015-07-14
Supplement: aair-7-538-s003.pdf [file aair-7-538-s003.pdf]

**Table S3.** The characteristics of included study (cross-section study)

| Study                      | Study Design                                                                                                                                                                                                                      | Definition of outcomes                                                                                                                                                                                   | Measurement of folate/folic acid status | Main Findings                                                                                                   | Study Limitations                                                                        | Adjusted factors                                                                         |
|----------------------------|-----------------------------------------------------------------------------------------------------------------------------------------------------------------------------------------------------------------------------------|----------------------------------------------------------------------------------------------------------------------------------------------------------------------------------------------------------|-----------------------------------------|-----------------------------------------------------------------------------------------------------------------|------------------------------------------------------------------------------------------|------------------------------------------------------------------------------------------|
| Thuesen 2009 <sup>24</sup> | Cross-sectional study of 1,207 adults (15-77 yr) in Denmark, carried out in 1997-1998                                                                                                                                             | Asthma: diagnose of allergic asthma, and self-reported allergy and asthma<br>SPT reactivity: at least one positive SPT<br>slgE positivity: a positive test to at least one of the six inhalant allergens | <i>MTHFR</i> C677T polymorphism         | No significant associations between <i>MTHFR</i> C677T polymorphism and asthma or allergy                       | Lack of data on folate levels, and potential selection bias                              | Sex, age, BMI, smoking, social status and alcohol intake                                 |
| Matsui 2009 <sup>25</sup>  | Cross-sectional study of 8,083 individuals ( $\geq 2$ yr) in USA, collected data from the 2005-2006 National Health and Nutrition Examination Survey<br>Wheeze: symptom<br>Atopy: at least 1 positive allergen-specific IgE level | Asthma: doctor-diagnosed                                                                                                                                                                                 | Serum folate level                      | Higher serum folate levels were inversely associated with a lower risk of wheeze and atopy, but not with asthma | Nonassessment of the effect with different age group, and lack of data on dietary intake | Age, sex, race/ethnicity, and poverty income ratio                                       |
| Woods 2003 <sup>26</sup>   | Cross-sectional study of 1,601 adults in Australia, carried out in 1999<br>Atopy: a $\geq 3$ mm wheal diameter in response to any allergen in SPT                                                                                 | Asthma: self-reported or doctor-diagnosed                                                                                                                                                                | folate consumption from foods           | No consistent associations between intakes of folate and asthma, BHR, or atopy                                  | Potential selection bias                                                                 | Age, sex, body mass index, smoking status, region of birth, and family history of asthma |
