# Supplementary material for: Is Folate Status a Risk Factor for Asthma or Other Allergic Diseases?
Source: PubMed Central journal article supplement — Allergy Asthma Immunol Res. 2015 Jul 14;7(6):538–46. doi: 10.4168/aair.2015.7.6.538 (PMC4605926; doi:10.4168/aair.2015.7.6.538), 2015-07-14
Supplement: aair-7-538-s004.pdf [file aair-7-538-s004.pdf]

## REFERENCES:

1. Kim JH, Jeong KS, Ha EH, Park H, Ha M, Hong YC, et al. Relationship between prenatal and postnatal exposures to folate and risks of allergic and respiratory diseases in early childhood. *Pediatr Pulmonol* 2014.
2. van der Valk RJ, Kiefte-de Jong JC, Sonnenschein-van der Voort AM, Duijts L, Hafkamp-de Groen E, Moll HA, et al. Neonatal folate, homocysteine, vitamin B12 levels and methylenetetrahydrofolate reductase variants in childhood asthma and eczema. *Allergy* 2013; 68:788-95.
3. Okupa AY, Lemanske Jr RE, Jackson DJ, Evans MD, Wood RA, Matsui EC. Early-life folate levels are associated with incident allergic sensitization. *Journal of Allergy and Clinical Immunology* 2013; 131:226-8e3.
4. Lin JH, Matsui W, Aloe C, Peng RD, Diette GB, Breyse PN, et al. Relationships between folate and inflammatory features of asthma. *Journal of Allergy and Clinical Immunology* 2013;131:918-20.
5. Martinussen MP, Risnes KR, Jacobsen GW, Bracken MB. Folic acid supplementation in early pregnancy and asthma in children aged 6 years. *Am J Obstet Gynecol* 2012;206:72 e1-7.
6. Bekkers MB, Elstgeest LE, Scholtens S, Haveman-Nies A, de Jongste JC, Kerkhof M, et al. Maternal use of folic acid supplements during pregnancy, and childhood respiratory health and atopy. *Eur Respir J* 2012;39:1468-74.
7. Kiefte-de Jong JC, Timmermans S, Jaddoe VW, Hofman A, Tiemeier H, Steegers EA, et al. High circulating folate and vitamin B-12 concentrations in women during pregnancy are associated with increased prevalence of atopic dermatitis in their offspring. *J Nutr* 2012;142:731-8.
8. Dunstan JA, West C, McCarthy S, Metcalfe J, Meldrum S, Oddy WH, et al. The relationship between maternal folate status in pregnancy, cord blood folate levels, and allergic outcomes in early childhood. *Allergy* 2012;67:50-7.
9. Magdelijns FJ, Mommers M, Penders J, Smits L, Thijs C. Folic acid use in pregnancy and the development of atopy, asthma, and lung function in childhood. *Pediatrics* 2011;128:e135-44.
10. Nwaru BI, Erkkola M, Ahonen S, Kaila M, Kronberg-Kippila C, Ilonen J, et al. Intake of antioxidants during pregnancy and the risk of allergies and asthma in the offspring. *European Journal of Clinical Nutrition* 2011;65:937-43.
11. Miyake Y, Sasaki S, Tanaka K, Hirota Y. Maternal B vitamin intake during pregnancy and wheeze and eczema in Japanese infants aged 16-24 months: the Osaka Maternal and Child Health Study. *Pediatr Allergy Immunol* 2011;22:69-74.
12. Thuesen BH, Husemoen LL, Ovesen L, Jørgensen T, Fenger M, Gilderson G, et al. Atopy, asthma, and lung function in relation to folate and vitamin B(12) in adults. *Allergy* 2010;65:1446-54.
13. Whitrow MJ, Moore VM, Rumbold AR, Davies MJ. Effect of supplemental folic acid in pregnancy on childhood asthma: a prospective birth cohort study. *Am J Epidemiol* 2009;170:1486-93.
14. Haberg SE, London SJ, Stigum H, Nafstad P, Nystad W. Folic acid supplements in pregnancy and early childhood respiratory health. *Arch Dis Child* 2009;94:180-4.
15. Granell R, Heron J, Lewis S, Davey Smith G, Sterne JA, Henderson J. The association between mother and child MTHFR C677T polymorphisms, dietary folate intake and childhood atopy in a population-based, longitudinal birth cohort. *Clin Exp Allergy* 2008;38:320-8.
16. Litonjua AA, Rifas-Shiman SL, Ly NP, Tantisira KG, Rich-Edwards JW, Camargo CA Jr, et al. Maternal antioxidant intake in pregnancy and wheezing illnesses in children at 2 y of age. *Am J Clin Nutr* 2006;84:903-11.
17. Haberg SE, London SJ, Nafstad P, Nilsen RM, Ueland PM, Vollset SE, et al. Maternal folate levels in pregnancy and asthma in children at age 3 years. *Journal of Allergy and Clinical Immunology* 2011;127:262-4.
18. Farres MN, Shahin RY, Melek NA, El-Kabarity RH, Arafa NA. Study of Folate Status Among Egyptian Asthmatics. *Internal Medicine* 2011;50:205-11.
19. Bueso AK, Berntsen S, Mowinckel P, Andersen LE, Lodrup Carlsen KC, Carlsen KH. Dietary intake in adolescents with asthma--potential for improvement. *Pediatr Allergy Immunol* 2011;22:19-24.
20. Shaheen MA, Attia EA, Louka ML, Bareedy N. Study of the role of serum folic acid in atopic dermatitis: A correlation with serum IgE and disease severity. *Indian J Dermatol* 2011;56:673-7.
21. Oh SY, Chung J, Kim MK, Kwon SO, Cho BH. Antioxidant nutrient intakes and corresponding biomarkers associated with the risk of atopic dermatitis in young children. *Eur J Clin Nutr* 2010;64:245-52.
22. Patel BD, Welch AA, Bingham SA, Luben RN, Day NE, Khaw KT, et al. Dietary antioxidants and asthma in adults. *Thorax* 2006;61:388-93.
23. Zou CC, Tang LE, Jiang MZ, Zhao ZY, Hirokazu T, Mitsufumi M. [Methylenetetrahydrofolate reductase [correction of reductase] polymorphism and asthma]. *Zhonghua Jie He He Hu Xi Za Zhi* 2003;26:161-4.
24. Thuesen BH, Husemoen LL, Fenger M, Linneberg A. Lack of association between the MTHFR (C677T) polymorphism and atopic disease. *Clin Respir J* 2009;3:102-8.
25. Matsui EC, Matsui W. Higher serum folate levels are associated with a lower risk of atopy and wheeze. *J Allergy Clin Immunol* 2009;123:1253-9 e2.
26. Woods RK, Walters EH, Raven JM, Wolfe R, Ireland PD, Thien FC, et al. Food and nutrient intakes and asthma risk in young adults. *Am J Clin Nutr* 2003;78:414-21.
